# Supplementary material
Source: Springer Nature journal article supplement (https://www.springermedizin.de/resource/supplementary/13054_2009_7619_MOESM5_ESM.pdf/9730154)

### Baseline

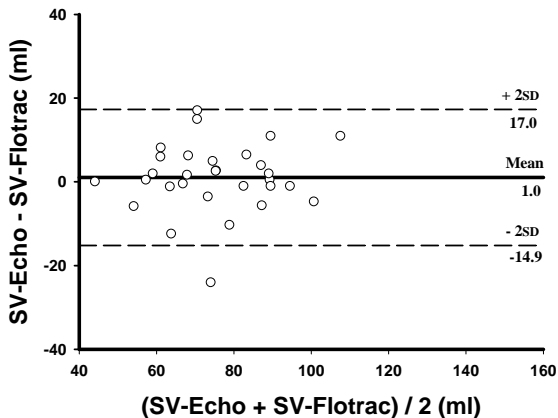

### During Passive Leg Raising

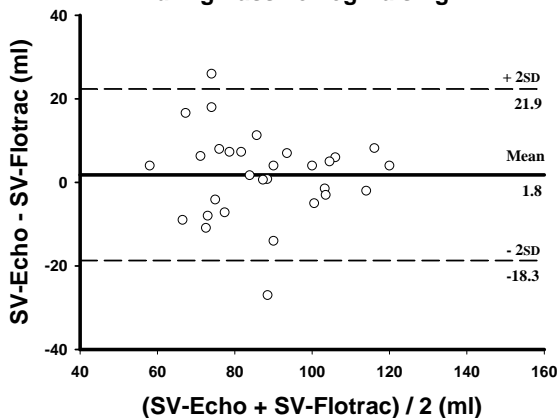

### Before Volume Expansion

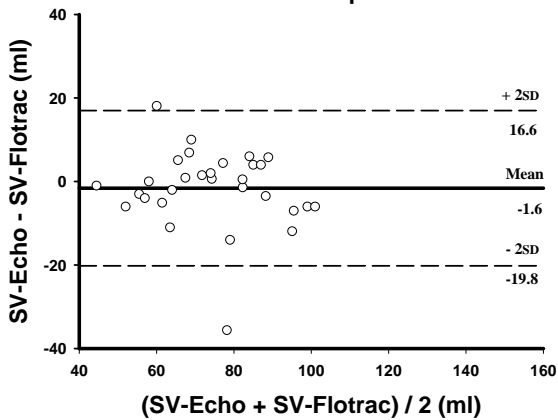

### After Volume Expansion

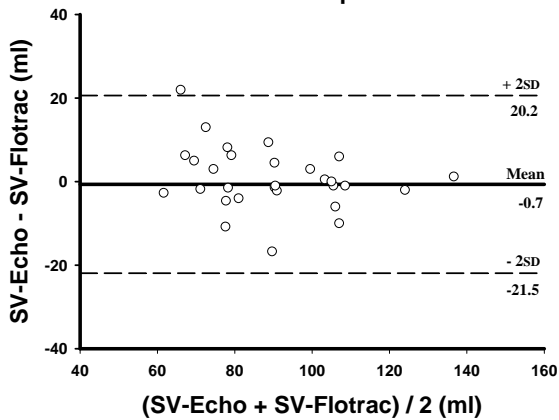

Supplement: MOESM5 [file 9730154]
